# Supplementary material for: Glutathione Transferases Are Involved in the Genotype-Specific Salt-Stress Response of Tomato Plants
Source: Antioxidants (Basel). 2023 Aug 28;12(9):1682. doi: 10.3390/antiox12091682 (PMC10525892; doi:10.3390/antiox12091682)
Supplement: Supplementary file 1 [file antioxidants-12-01682-s001.zip › Supplementary Tables.xlsx]

## Sheet: Table S1 - cis elements
Table S1. The number of redox-related cis-regulatory elements used for GST gene selection for gene expression studies. The in silico screening of selected GSTs 5’ regulatory regions (1500 bp up-stream from the start codon) found in the Sol Genomics Network database (http://solgenomics.net) was performed using NewPLACE (Higo et al. 1998). The dark red color indicates a high number of cis-regulator…
		W-box element	ABRE	TGACG-motif	GCC-box
		WBOXATNPR1	ABRELATERD1	ASF1MOTIFCAMV	GCCCORE
		TTGAC	ACGTG	TGAC	GCCGCC
	DHAR2	2	0	0	0
	DHAR3	1	1	1	0
	DHAR5	0	1	0	0
	GSTF1	2	4	1	0
	GSTF2	2	2	1	0
	GSTF3	4	1	3	0
	GSTF4	3	0	1	0
	GSTF5	0	6	0	0
	GSTU4	7	1	0	0
	GSTU5	5	1	1	0
	GSTU14	7	0	0	0
	GSTU15	5	1	0	0
	GSTU21	8	4	2	0
	GSTU23	5	2	1	0
	GSTU24	1	4	2	0
	GSTU26	8	0	1	0
	GSTU27	6	0	1	0
	GSTU30	3	2	1	0
	GSTU32	5	2	0	1
	GSTU36	5	1	1	0
	GSTU44	2	0	0	1
	GSTU46	5	1	2	0
	GSTU47	6	2	3	0
	GSTU51	6	2	3	0
	GSTU54	4	2	0	0
	GSTT1	2	1	1	0
	GSTT2	3	1	1	0
Higo, K. Place: A database of plant cis-acting regulatory DNA elements. Nucleic Acids Research 1998, 26, 358–359.

## Sheet: Table S2 - primers
Table S2. Primer pairs used in the high throughput quantitative real-time PCR (HT-qPCR) for detection of gene expression changes in the tomato (Solanum lycopersicum L.) plants. The name of genes were colored accordingly: grey - GRs; yellow - DHARs; purple - GSTFs; blue - GSTUs; white - GSTTs.
Name used in the articel	Name of the gene	SGN locus ID	NCBI accession number of investigated sequences	Direct and reverse primer pair sequences (5’ to 3’)	Reference
GR1	SlGR1	Solyc09g065900.2.1	NM_001247314.2	F: TTCGGAATTGCCTTCACTTATT	Gallé et al. 2021
				R: GTTGTACTGAGCTTTGGTGAGC
GR2	SlGR2	Solyc09g091840.2.1	NM_001321394.1	F: TGGTGCGATTTTGTTTTTGT	Gallé et al. 2021
				R: TCTGTTGGTCCTCACAAACG
DHAR2	SlDHAR2	Solyc05g054760.2.1	NM_001247893.2	F: TTCCTACCTTCGTCTCATTTCTG	Csiszár et all. 2014
				R: AACAAACATTCTGCCCATTGA
DHAR3	SlDHAR3	Solyc06g075520.2.1	XM_026031742.1	F: TTGATTTGGCTGGTGTCGTA	Gallé et al. 2021
				R: TCTCCTCATACTTTTCTGCTGGA
DHAR5	SlDHAR5	Solyc11g011250.1.1	NM_001247295.3	F: GGTGCCAGATTCAGATGTCA	Csiszár et all. 2014
				R: CGGAGTCTTTGCTTTTCAGG
GSTF1	SlGSTF1	Solyc02g081340.2.1	XM_004232621.4	F: CGGAACGACATTGGAAGAA	Gallé et al. 2021
				R: AGGGAATACGAGGAGTTGGAG
GSTF2	SlGSTF2	Solyc06g009020.2.1	XM_004240488.4	F: TGAAAGGAAGGGGGAACAAT	Gallé et al. 2021
				R: GAGCACACCACAAAGCAAAA
GSTF3	SlGSTF3	Solyc06g009040.2.1	XM_004240489.4	F: TTGGTGCTTGGGTTGCTAAT	Gallé et al. 2021
				R: CTTTTGCTCCTCAGCCTACG
GSTF4	SlGSTF4	Solyc09g074850.2.1	XM_004247394.4	F: CGTGTGAGTGTATGGTGTGCT	present publication
				R: CATCTTCTCCAACCCCTTCA
GSTF5	SlGSTF5	Solyc12g094430.1.1	XM_004253087.4	F: CCGATCTCTCTCACCTTCCA	Csiszár et all. 2014
				R: TGCTCTGTCTGTCCCGTTC
GSTT1	SlGSTT1	Solyc04g050560.2.1	XM_019213544.2	F: TTTTCCACCCGTTTCTCTTG	Gallé et al. 2021
				R: GCGATTTTCCCTCAGACAGT
GSTT2	SlGSTT2	Solyc08g080900.2.1	XM_004245567.4	F: TGGACTGGCATCACTCAAAC	Gallé et al. 2021
				R: CAAAAGCAGGAGCAAGAACA
GSTU4	SlGSTU4	Solyc01g081310.2.1	NM_001247159.2	F: TACACCGCCCAAAGACAAAT	Gallé et al. 2021
				R: CTGAAGCAACCAACATCTCG
GSTU5	SlGSTU5	Solyc01g086680.2.1	NM_001247153.2	F: CCCTCTTGCCTAAACATCCA	Gallé et al. 2021
				R: TCTCCCTTTCTTCTCCTTTGC
GSTU14	SlGSTU14	Solyc05g026220.1.1	XM_049547815.1	F: AAAGTTAACGGGTGGACGTG	Gallé et al. 2021
				R: TCTTGAGGGATAATTGTAAAGGTG
GSTU15	SlGSTU15	Solyc06g069040.2.1	NM_001247162.2	F: GTCACCTCCACCTCCGTAAA	Gallé et al. 2021
				R: TGCTCAAAGGCATACACAAA
GSTU21	SlGSTU21	Solyc07g056450.2.1	XM_010325321.3	F: TGGTATGAGGCTAAGGATTGC	Gallé et al. 2021
				R: GGGCTTTTGTTCCACACATC
GSTU23	SlGSTU23	Solyc07g056470.2.1	XM_004243148.3	F: GGTGATTTTGTTGGATTTTTGG	Gallé et al. 2021
				R: AGCAGAGGGCTTTTGTTCG
GSTU24	SlGSTU24	Solyc07g056480.2.1	NM_001247450.2	F: TTGCGAGTCTATTATTGGAGTTGA	Csiszár et all. 2014
				R: GGATCAGAAGGGAGGAAAGG
GSTU26	SlGSTU26	Solyc07g056500.2.1	NM_001247165.2	F: TGCTAGGTTTTGGGCTGATT	Csiszár et all. 2014
				R: TTGGCTGTTTTGTGCTCTTC
GSTU27	SlGSTU27	Solyc07g056510.2.1	XM_004243145.4	F: CCTTTGGTATGAGGGTGAGAA	Gallé et al. 2021
				R: AAAACTGGGATTTGCTTATGGA
GSTU30	SlGSTU30	Solyc09g011500.2.1	XM_004246339.3	F: TTGCTAAGGAACTTCCATGTTTT	Gallé et al. 2021
				R: TGTGTTTGTGATCTCCCTTGA
GSTU32	SlGSTU32	Solyc09g011520.2.1	XM_004246338.4	F: GCAAAGGAGAGGAGCAAGAG	Gallé et al. 2021
				R: CATCCAAAGTCCCACCAAAT
GSTU36	SlGSTU36	Solyc09g011560.2.1	XM_004246336.4	F: GGTCCTTCCATTTTGCCTAA	Gallé et al. 2021
				R: GAAACTTGTCCCCACTGCTG
GSTU44	SlGSTU44	Solyc09g011640.2.1	XM_004246331.4	F: GGAGTGTGGTGAGTTGTTGAAA	Gallé et al. 2021
				R: TCCCATCCAAAATGCCAAT
GSTU46	SlGSTU46	Solyc09g063150.2.1	XM_004247069.4	F: GAGCAAGTCAAGGCAACTGA	Gallé et al. 2021
				R: AGAAAGCAAGCCACCCAAAG
GSTU47	SlGSTU47	Solyc09g091130.2.1	XM_004247758.3	F: GAACAAGAAAAGGCAGTGAAGG	Gallé et al. 2021
				R: CCAATGACAAATCCATCCAA
GSTU51	SlGSTU51	Solyc10g084960.1.1	XM_004249500.4	F: GAGCCAAGGAGATGAGCAAG	Gallé et al. 2021
				R: CCTATCCAAAATCCGACAAAAT
GSTU54	SlGSTU54	Solyc12g011320.1.1	XM_004251781.4	F: TCCCTTATTGCCCTATGAACC	Gallé et al. 2021
				R: TTTCTTGCCATTTTCTTGCTC
DREB1	SlDREB1	Solyc06g050520.1.1	NM_001247760.1	F: ATGAGAAACTAGACAATGAAGGG	present publication
				R: TAACACCTCTGTATTTACACCGC
DREB2	SlDREB2	Solyc05g052410.1.1	NM_001329213.2	F: AGGGAGCCACATAGAGGGAG	present publication
				R: GCACAAGGACCATACATCGC
MYC2	SlMYC2	Solyc08g076930.1.1	NM_001324483.1	F: CCCTTCAGCAGCGTCTTCAA	present publication
				R: AACCATCTCCCCAACCCAAC
WRKY3	SlWRKY3	Solyc02g088340.2.1	NM_001347388.1	F: GACATCCTCTGGTGCTCTCG	present publication
				R: ACCGCTCAACCTTCTTCTTC
WRKY7	SlWRKY7	Solyc04g078550.2.1	XM_004238082.4	F: TGCCACTGCCCAAAGAAAAG	present publication
				R: GGATGAGGAGAACCCTTGAT
WRKY39	SlWRKY39	Solyc03g116890.2.1	NM_001316915.1	F: TCTAAAGTGGATACCGCAGGC	present publication
				R: GTTTGTCTTGGCATTACCGCA
WRKY72	SlWRKY72	Solyc02g067430.2.1	XM_004233876.4	F: CCCGTGAGGAAACAAGTCCA	present publication
				R: ACCCGAAAGAAGCATAGAGG
WRKY74	SlWRKY74	Solyc06g070990.2.1	NM_001247844.3	F: CCACCACCACTACCCCTACT	present publication
				R: GCGGATGCTGAGATGGATGA
Actin		Solyc03g078400.2.1	NM_001308447.1	F: TGAGGATATTCAGCCCCTTG	Gallé et al. 2021
				R: CGACCATAACACCTGTGTGC
Elongation factor 1α		Solyc06g005060.2.1	NM_001247106.2	F: GGAACTTGAGAAGGAGGCTAAG	present publication
				R: CAACACCGACAGCAACAGTCT
Gallé, Á.; Bela, K.; Hajnal, Á.; Faragó, N.; Horváth, E.; Horváth, M.; Puskás, L.; Csiszár, J. Crosstalk between the redox signalling and the detoxification: GSTs under redox control? Plant Physiology and Biochemistry 2021, 169, 149–159.
Csiszár, J.; Horváth, E.; Váry, Z.; Gallé, Á.; Bela, K.; Brunner, S.; Tari, I. Glutathione transferase Supergene family in Tomato: Salt stress-regulated expression of representative genes from distinct GST classes in plants primed with salicylic acid. Plant Physiology and Biochemistry 2014, 78, 15–26.

## Sheet: Table S3 - TF selection
Table S3. Selection of the investigated transcription factors based on the literature.
Name used in the articel	Locus	Function/supposed role	References
DREB1	Solyc06g050520.1.1	drought tolerance, maintaining the balance of osmotic potentials	Thirumalaikumar et al. 2017; Jiang et al. 2016
DREB2	Solyc05g052410.1.1	salt stress tolerance, abscisic acid biosynthesis/signalling, enhanced synthesis of osmoprotectants	Hichri et al. 2015
MYC2	Solyc08g076930.1.1	positively regulates both wound-responsive and pathogen-responsive genes, involved in early response to jasmonate	Du et al. 2017
WRKY3	Solyc02g088340.2.1	salinity tolerance, cellular detoxification (ROS), better osmotic adjustment, mebrane protection	Hichri et al. 2017
WRKY7	Solyc04g078550.2.1	drought tolerance	Huang et al. 2012
WRKY39	Solyc03g116890.2.1	positive regulatory component of tomato against biotic and abiotic stress, activates expression of both pathogenesis-related genes and stress (salt and drought) related genes	Sun et al. 2015
WRKY72	Solyc02g067430.2.1	drought tolerance	Karkute et al. 2018
WRKY74	Solyc06g070990.2.1	drought tolerance, nematode resistance	Huang et al. 2012; Bhattarai et al. 2010
Thirumalaikumar, V. P.; Devkar, V.; Mehterov, N.; Ali, S.; Ozgur, R.; Turkan, I.; Mueller-Roeber, B.; Balazadeh, S. NAC transcription factor Jungbrunnen1 enhances drought tolerance in tomato. Plant Biotechnology Journal 2017, 16, 354–366. doi: 10.1111/pbi.12776.
Jiang, L.; Wang, Y.; Zhang, S.; He, R.; Li, W.; Han, J.; Cheng, X. Tomato SLDREB1 gene conferred the transcriptional activation of drought-induced gene and an enhanced tolerance of the transgenic arabidopsis to drought stress. Plant Growth Regulation 2016, 81, 131–145. https://doi.org/10.1007/s10725-016-0195-6
Hichri, I.; Muhovski, Y.; Clippe, A.; Žižková, E.; Dobrev, P. I.; Motyka, V.; Lutts, S. SlDREB2, a tomato dehydration-responsive element-binding 2 transcription factor, mediates salt stress tolerance in tomato and Arabidopsis. Plant, Cell & Environment 2015, 39, 62–79. doi: 10.1111/pce.12591.
Du, M.; Zhao, J.; Tzeng, D. T. W.; Liu, Y.; Deng, L.; Yang, T.; Zhai, Q.; Wu, F.; Huang, Z.; Zhou, M.; Wang, Q.; Chen, Q.; Zhong, S.; Li, C.-B.; Li, C. MYC2 orchestrates a hierarchical transcriptional cascade that regulates jasmonate-mediated plant immunity in tomato. The Plant Cell 2017, 29, 1883–1906. doi: 10.1105/tpc.16.00953.
Hichri, I.; Muhovski, Y.; Žižková, E.; Dobrev, P. I.; Gharbi, E.; Franco-Zorrilla, J. M.; Lopez-Vidriero, I.; Solano, R.; Clippe, A.; Errachid, A.; Motyka, V.; Lutts, S. The solanum lycopersicum WRKY3 transcription factor SLWRKY3 is involved in salt stress tolerance in tomato. Frontiers in Plant Science 2017, 8. doi: 10.3389/fpls.2017.01343.
Huang, S.; Gao, Y.; Liu, J.; Peng, X.; Niu, X.; Fei, Z.; Cao, S.; Liu, Y. Genome-wide analysis of WRKY transcription factors in solanum lycopersicum. Molecular Genetics and Genomics 2012, 287, 495–513. doi: 10.1007/s00438-012-0696-6
Sun, X.-chun; Gao, Y.-feng; Li, H.-rong; Yang, S.-zhang; Liu, Y.-sheng Over-expression of SlWRKY39 leads to enhanced resistance to multiple stress factors in tomato. Journal of Plant Biology 2015, 58, 52–60. https://doi.org/10.1007/s12374-014-0407-4
Karkute, S. G.; Gujjar, R. S.; Rai, A.; Akhtar, M.; Singh, M.; Singh, B. Genome wide expression analysis of WRKY genes in tomato (solanum lycopersicum) under drought stress. Plant Gene 2018, 13, 8–17. doi: 10.1016/j.plgene.2017.11.002.
Bhattarai, K. K.; Atamian, H. S.; Kaloshian, I.; Eulgem, T. WRKY72-type transcription factors contribute to basal immunity in tomato and Arabidopsis as well as gene-for-gene resistance mediated by the tomato R gene Mi-1. The Plant Journal 2010, 63, 229–240. doi: 10.1111/j.1365-313X.2010. 04232.x

## Sheet: Table S4 - deltaCt value
Table S4. Average of ΔCt values for each genes of 5-week-old tomato plants under control conditions (Control) and after one week of 100 mM NaCl treatment (NaCl) measured by high throughput quantitative real-time PCR (HT-qPCR). ΔCt values were used to calculate Pearson's correlation coefficients. The name of genes were colored accordingly: grey - GRs; yellow - DHARs; purple - GSTFs; blue - GSTUs; …
	Control leaves					NaCl leaves						Control roots					NaCl roots
	Mm	Mo	El			Mm	Mo	El				Mm	Mo	El			Mm	Mo	El
DHAR2	2.19305	2.26981	2.87657		DHAR2	3.03307	1.90468	2.66266			DHAR2	5.46398	6.563	6.21433		DHAR2	6.12974	6.46467	6.71177
DHAR3	6.93071	9.28352	10.8821		DHAR3	12.3405	11.4033	12.0651			DHAR3	9.64203	7.99541	9.32236		DHAR3	10.3671	9.60493	9.2062
DHAR5	1.05322	1.87022	0.990772		DHAR5	1.26991	1.75285	1.39885			DHAR5	4.3766	5.8712	5.20325		DHAR5	4.98228	4.60367	4.96998
GR1	5.605	5.42333	5.24167		GR1	5.63667	5.39167	5.80333			GR1	6.89167	7.03167	6.98333		GR1	7.225	6.47667	6.1
GR2	5.56667	4.64333	5.08333		GR2	5.92167	5.04667	5.225			GR2	3.205	2.16667	3.24		GR2	3.20667	2.08167	1.71
GSTF1	1.71164	3.16722	2.85311		GSTF1	4.52347	5.22804	5.38998			GSTF1	8.59013	9.47247	10.0159		GSTF1	8.97341	9.21488	9.12914
GSTF2	3.85225	4.39346	4.16479		GSTF2	5.02148	6.88801	5.39494			GSTF2	4.97627	4.72221	4.6032		GSTF2	4.34732	4.41408	4.17423
GSTF3	1.72747	1.5908	1.64938		GSTF3	2.33326	1.2804	1.18484			GSTF3	4.82998	5.9021	6.7131		GSTF3	6.65007	5.96914	6.41346
GSTF4	3.96879	6.85775	7.04584		GSTF4	7.21855	6.40354	6.14052			GSTF4	4.8727	4.99859	4.68979		GSTF4	4.79422	4.61893	4.84371
GSTF5	2.81179	3.71291	3.53842		GSTF5	3.55492	3.24001	3.65696			GSTF5	6.51531	7.16362	6.74896		GSTF5	6.8017	6.92129	6.96793
GSTT1	5.10519	7.81734	7.81679		GSTT1	8.1068	7.56702	7.87621			GSTT1	8.008	7.95021	7.89967		GSTT1	7.9833	7.7054	7.80983
GSTT2	2.31894	3.35376	2.93417		GSTT2	3.72925	2.85492	3.41721			GSTT2	4.09203	3.57189	3.81088		GSTT2	3.58362	3.49245	3.13873
GSTU4	3.37351	5.43983	5.59702		GSTU4	6.21719	6.01826	6.33488			GSTU4	7.10297	6.56662	7.07073		GSTU4	6.51007	6.07595	6.28452
GSTU5	6.43499	12.4591	12.0318		GSTU5	12.6545	12.7069	19.2986			GSTU5	9.59435	8.87794	10.4694		GSTU5	10.1518	9.03616	7.24049
GSTU14	7.69594	12.3765	14.0964		GSTU14	14.1911	12.8775	12.878			GSTU14	12.8237	13.3617	12.8807		GSTU14	12.021	12.9767	11.4279
GSTU15	6.50099	12.9252	12.7662		GSTU15	12.9644	15.3645	14.1418			GSTU15	15.1476	14.526	14.3641		GSTU15	13.0147	12.6483	13.0634
GSTU21	7.89564	12.6128	11.3145		GSTU21	13.1742	12.3358	12.7695			GSTU21	13.2549	13.4893	13.3293		GSTU21	13.3906	13.7485	13.6131
GSTU23	5.41437	8.34033	8.21142		GSTU23	9.04083	8.21915	8.30803			GSTU23	5.52311	5.49107	5.79834		GSTU23	5.66015	5.30748	4.9736
GSTU24	1.51651	0.783607	0.797176		GSTU24	1.50051	0.762558	1.31016			GSTU24	1.92738	1.97201	1.77078		GSTU24	1.85709	2.08082	1.55849
GSTU26	4.62912	7.12669	6.42824		GSTU26	7.794	7.16362	7.13463			GSTU26	6.88286	6.38924	6.42662		GSTU26	6.07729	6.57187	5.07717
GSTU27	5.35315	9.85362	8.73518		GSTU27	9.81102	9.97334	10.9358			GSTU27	7.64351	7.374	8.45585		GSTU27	7.4523	6.31552	5.27287
GSTU30	6.76039	25.6327	13.8038		GSTU30	6.81543	17.556	14.5466			GSTU30	8.80089	8.53958	8.75492		GSTU30	8.8336	8.99076	8.36353
GSTU32	5.03366	11.48	10.9296		GSTU32	12.1189	12.5963	12.0672			GSTU32	5.87673	5.40905	6.16112		GSTU32	4.60138	4.40798	3.96919
GSTU36	2.66207	3.34327	3.18022		GSTU36	4.19044	3.20988	3.932			GSTU36	3.00522	3.18985	3.38268		GSTU36	3.01847	3.32117	2.701
GSTU44	4.27359	6.9884	6.61974		GSTU44	7.1104	7.10793	7.27692			GSTU44	7.30495	6.99234	7.09019		GSTU44	6.93903	6.89306	6.59275
GSTU46	6.39093	12.8821	12.7427		GSTU46	13.3026	12.0005	14.3187			GSTU46	7.8558	6.98776	7.18117		GSTU46	6.91404	6.88047	7.27654
GSTU47	5.1298	13.54	12.7521		GSTU47	15.3196	15.8813	12.5492			GSTU47	9.44576	7.79076	9.63917		GSTU47	7.8454	5.96476	5.81436
GSTU51	6.40181	11.7776	11.9039		GSTU51	12.4481	11.6732	11.8834			GSTU51	10.0275	9.80263	11.9223		GSTU51	9.44624	9.45559	9.5377
GSTU54	5.81682	9.32452	9.45807		GSTU54	9.40475	9.08051	9.48086			GSTU54	8.33111	7.66392	8.91876		GSTU54	8.12769	7.44486	7.75852
DREB1	9.96167	10.0308	10.1417		DREB1	9.76	10.9483	10.3058			DREB1	10.4592	9.93667	9.91833		DREB1	7.81417	9.18167	8.18167
DREB2	10.5067	10.8383	11.3233		DREB2	11.77	11.1633	10.85			DREB2	6.96667	6.175	7.28333		DREB2	5.975	4.89667	5.1375
WRKY3	5.06417	4.3325	3.32333		WRKY3	4.59333	4.09167	4.53833			WRKY3	5.94833	5.13333	4.76167		WRKY3	3.9125	3.07	3.36167
WRKY7	4.27	3.0775	3.75		WRKY7	4.44083	6.99333	6.27333			WRKY7	2.505	2.53	2.14		WRKY7	2.39667	4.58667	3.02667
WRKY39	11.815	2.63333	4.51		WRKY39	7.46417	5.55167	5.70833			WRKY39	5.96667	2.08667	1.835		WRKY39	4.155	2.32	1.325
WRKY72	n.d.	n.d.	n.d.		WRKY72	n.d.	n.d.	n.d.			WRKY72	7.405	7.18333	7.04		WRKY72	6.17917	5.74833	6.21833
WRKY74	14.03	12.9817	10.295		WRKY74	12.3992	12.07	11.975			WRKY74	4.52333	4.12833	4.23667		WRKY74	4.23833	3.51833	3.66167
MYC2	2.415	0.705	1.99167		MYC2	1.55667	1.68	1.70833			MYC2	1.73833	2.39833	2.26333		MYC2	1.84	1.95667	1.09917
